# Supplementary material for: [Ni(C17H20N4)4][H5PMoVI8VIV4O40(VIVO)2]·8H2O: confinement of heteropoly anions in Ni-containing rigid concave surfaces with high catalytic activity in the oxidation of styrene
Source: Royal Society of Chemistry journal article supplement (doi:10.1039/c2ce25419k), 2012-01-01
Supplement: c2ce25419k.pdf [file c2ce25419k.pdf]

## Supplementary Information

### **[Ni(C<sub>17</sub>H<sub>20</sub>N<sub>4</sub>)<sub>4</sub>][H<sub>5</sub>PMo<sup>VI</sup><sub>8</sub>V<sup>IV</sup><sub>4</sub>O<sub>40</sub>(V<sup>IV</sup>O)<sub>2</sub>]·8H<sub>2</sub>O: confinement of heteropoly anions in Ni-containing rigid concave surfaces with high catalytic activity in the oxidation of styrene**

Jie Fu,<sup>a</sup> Haixia Sun,<sup>b</sup> Yan Xu,<sup>\*a</sup> Congling Wang,<sup>a</sup> Hongke Liu<sup>b</sup>

<sup>a</sup> College of Chemistry and Chemical Engineering, State Key Laboratory of Materials-oriented Chemical Engineering, Nanjing University of Technology, Nanjing 210009, P. R. China.

<sup>b</sup> Jiangsu Province Key Laboratory of Biofunctional Material, School of Chemistry and Environmental Science, Nanjing Normal University, Nanjing 210046, PR China. E-mail: liuhongke@njnu.edu.cn

### **Contents:**

- 1. Details for catalytic activity experiment.**
- 2. Figure S1** The view of the discrete acyclic water pentamer in **1**.
- 3. Figure S2** The TG curve of compound **1**.
- 4. Figure S3** IR spectra of compound **1**.
- 5. Table S1** The O···O distances and O···O···O angles in water pentamer of **1**.
- 6. Table S2** Selected bond lengths (Å) for **1**.

### Details for catalytic activity experiments:

The oxidation of styrene was performed in a 50 ml double necked round bottom flask fitted in a water cooled condenser and a magnetic stirrer. 13 mmol styrene, 15 ml solvent ( $\text{CH}_3\text{CN}$ ) and 100 mg title compound were mixed in the flask and kept the temperature at 333 K, then 36 mmol dilute hydrogen peroxide (30%) was added to the flask. The mixture was analyzed by a gas chromatograph (GC-6890, FID; 30 m  $\times$  0.32 mm capillary column) after 3h reaction. The major products obtained were benzaldehyde and small amount of epoxide and benzoic acid with the conversion of styrene was 90% and the selectivity of benzaldehyde, epoxide and benzoic acid in the oxidation of styrene were 69.7%, 3.9% and 26.4%, respectively.

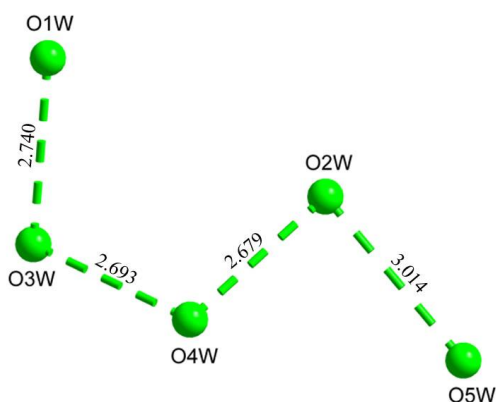

**Fig. S1** A view of the discrete acyclic water pentamer in **1**.

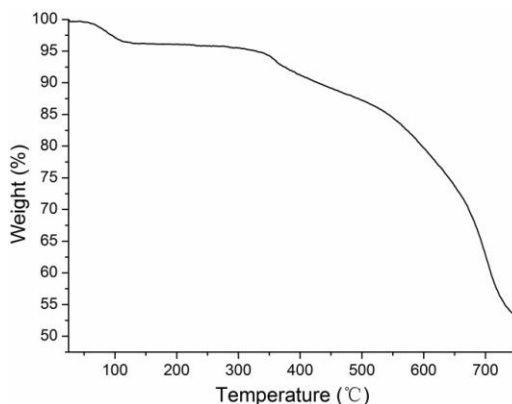

**Fig. S2** The TG curve of compound **1**.

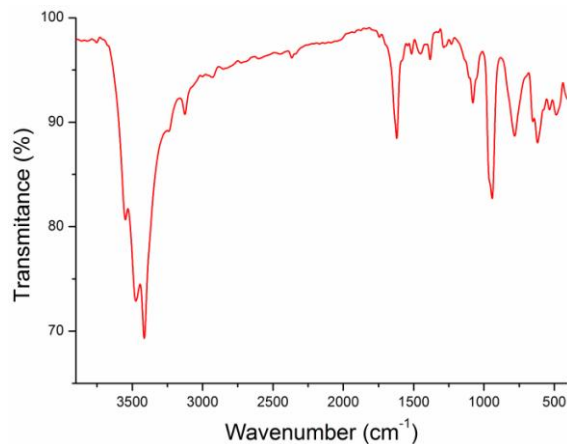

IR spectrum: 3414 $\text{cm}^{-1}$ ,  $\nu(\text{O-H})$ ; 1619  $\text{cm}^{-1}$ , 1383  $\text{cm}^{-1}$ ,  $\nu(\text{C-C})$ ,  $\nu(\text{C-N})$ ; 1081  $\text{cm}^{-1}$ ,  $\nu(\text{P-O})$ ; 940  $\text{cm}^{-1}$ ,  $\nu(\text{Mo=O})$ ; 781  $\text{cm}^{-1}$ ,  $\nu(\text{Mo-O-Mo})$ ; 620  $\text{cm}^{-1}$ ,  $\nu(\text{Mo-O})$

**Fig. S3** IR spectra of compound **1**.

**Table S1** The O...O distances and O...O...O angles in water pentamer of **1**.

|                 |               |                 |              |
|-----------------|---------------|-----------------|--------------|
| O1W...O3W       | 2.740(14)Å    | O4W...O2W       | 2.679(10)Å   |
| O3W...O4W       | 2.693(78)Å    | O2W...O5W       | 3.014(13)Å   |
| O1W...O3W...O4W | 101.136(376)° | O4W...O2W...O5W | 86.623(337)° |
| O3W...O4W...O2W | 101.608(308)° |                 |              |

**Table S2** Selected bond lengths (Å) for **1**

|               |          |               |          |
|---------------|----------|---------------|----------|
| Mo(1)-O(15)   | 1.690(3) | Ni(1)-N(5)#1  | 2.098(4) |
| Mo(1)-O(7)    | 1.788(3) | Ni(1)-N(5)    | 2.098(4) |
| Mo(1)-O(13)   | 1.827(3) | Ni(1)-O(19)#2 | 2.105(4) |
| Mo(1)-O(18)#1 | 2.056(2) | Ni(1)-O(21)   | 2.113(4) |
| Mo(1)-O(22)   | 2.064(3) | V(1)-O(1)     | 1.606(4) |
| Mo(1)-O(17)   | 2.436(3) | V(1)-O(6)     | 1.932(3) |
| Mo(2)-O(9)    | 1.697(3) | V(1)-O(7)#1   | 1.944(3) |
| Mo(2)-O(6)    | 1.792(3) | V(1)-O(16)    | 1.954(3) |
| Mo(2)-O(14)   | 1.815(3) | V(1)-O(12)#1  | 1.971(3) |
| Mo(2)-O(18)   | 2.071(2) | V(2)-O(2)     | 1.594(3) |
| Mo(2)-O(22)   | 2.085(3) | V(2)-O(14)    | 1.934(3) |

|              |          |               |          |
|--------------|----------|---------------|----------|
| Mo(2)-O(17)  | 2.437(3) | V(2)-O(11)    | 1.940(3) |
| Mo(3)-O(4)   | 1.695(3) | V(2)-O(10)    | 1.944(3) |
| Mo(3)-O(11)  | 1.798(3) | V(2)-O(13)    | 1.953(3) |
| Mo(3)-O(12)  | 1.800(3) | V(3)-O(21)    | 1.621(4) |
| Mo(3)-O(8)#1 | 2.049(2) | V(3)-O(20)    | 1.895(2) |
| Mo(3)-O(20)  | 2.082(3) | V(3)-O(20)#1  | 1.895(2) |
| Mo(3)-O(5)#1 | 2.459(2) | V(3)-O(8)#1   | 1.976(3) |
| Mo(4)-O(3)   | 1.695(3) | V(3)-O(8)     | 1.976(3) |
| Mo(4)-O(10)  | 1.792(3) | V(4)-O(19)    | 1.622(4) |
| Mo(4)-O(16)  | 1.831(3) | V(4)-O(18)    | 1.894(3) |
| Mo(4)-O(20)  | 2.047(3) | V(4)-O(18)#1  | 1.894(3) |
| Mo(4)-O(8)   | 2.070(2) | V(4)-O(22)#1  | 1.979(2) |
| Mo(4)-O(5)   | 2.440(3) | V(4)-O(22)    | 1.979(2) |
| P(1)-O(5)    | 1.534(3) | O(5)-Mo(3)#1  | 2.459(2) |
| P(1)-O(5)#1  | 1.534(3) | O(7)-V(1)#1   | 1.944(3) |
| P(1)-O(17)   | 1.537(3) | O(8)-Mo(3)#1  | 2.049(2) |
| P(1)-O(17)#1 | 1.537(3) | O(12)-V(1)#1  | 1.971(3) |
| Ni(1)-N(4)#1 | 2.082(4) | O(18)-Mo(1)#1 | 2.056(2) |
| Ni(1)-N(4)   | 2.082(4) | O(19)-Ni(1)#3 | 2.105(4) |

Symmetry transformations used to generate equivalent atoms:

#1  $-x+1, y, -z-1/2$  #2  $x, y-1, z$  #3  $x, y+1, z$
